# Supplementary material for: Glutathione S-Transferase pi-1 Knockdown Reduces Pancreatic Ductal Adenocarcinoma Growth by Activating Oxidative Stress Response Pathways
Source: MDPI journal article supplement (doi:10.3390/cancers12061501), 2020-06-09
Supplement: s1 [file s1]

# Supplementary Materials: Glutathione S-Transferase pi-1 Knockdown Reduces Pancreatic Ductal Adenocarcinoma Growth by Activating Oxidative Stress Response Pathways

Rahul R. Singh, Jiyan Mohammad, Megan Orr and Katie M. Reindl

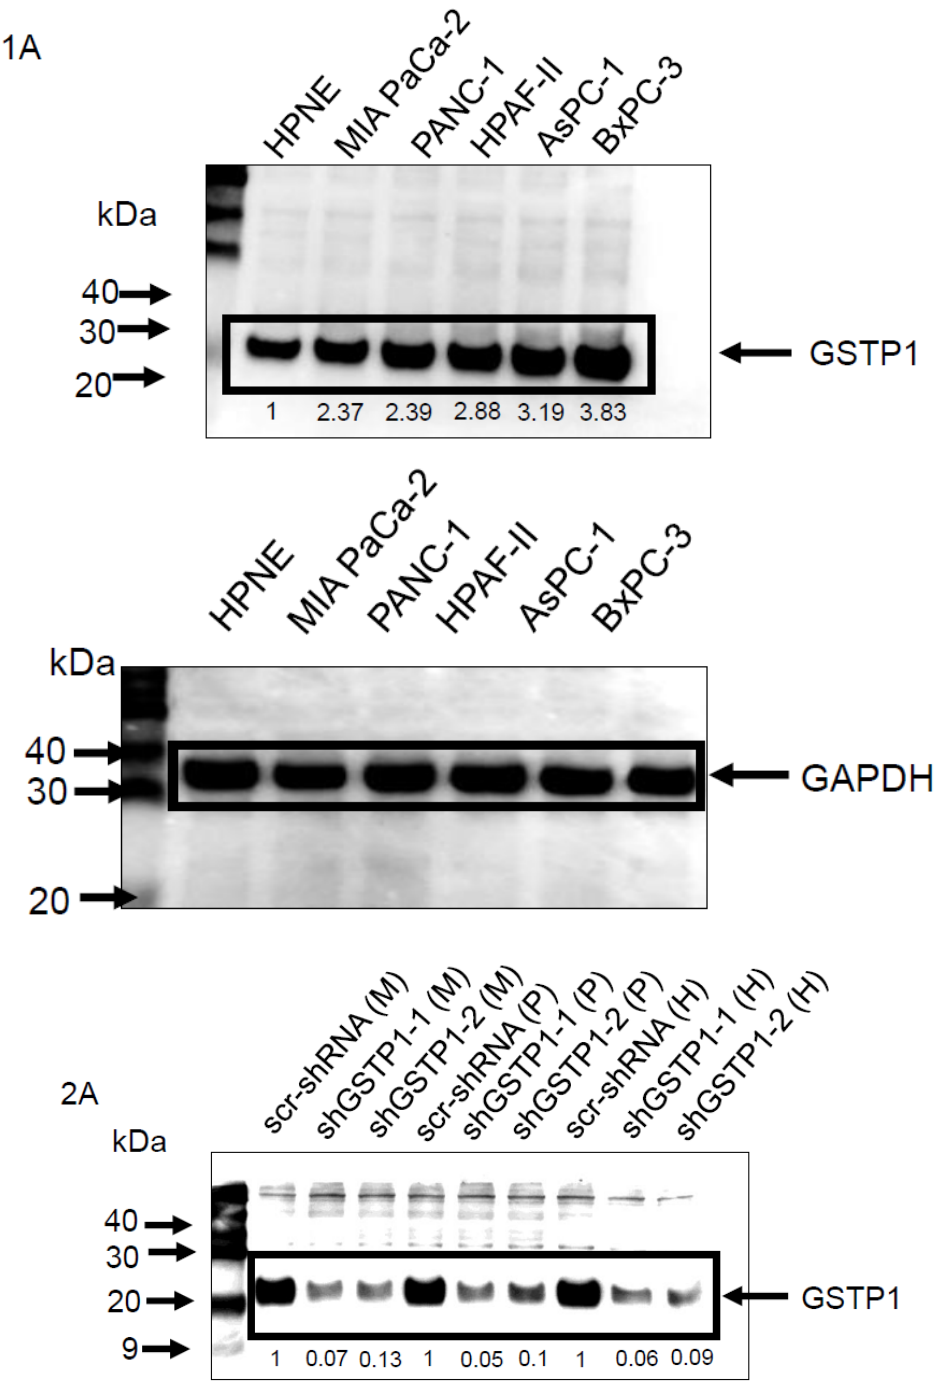

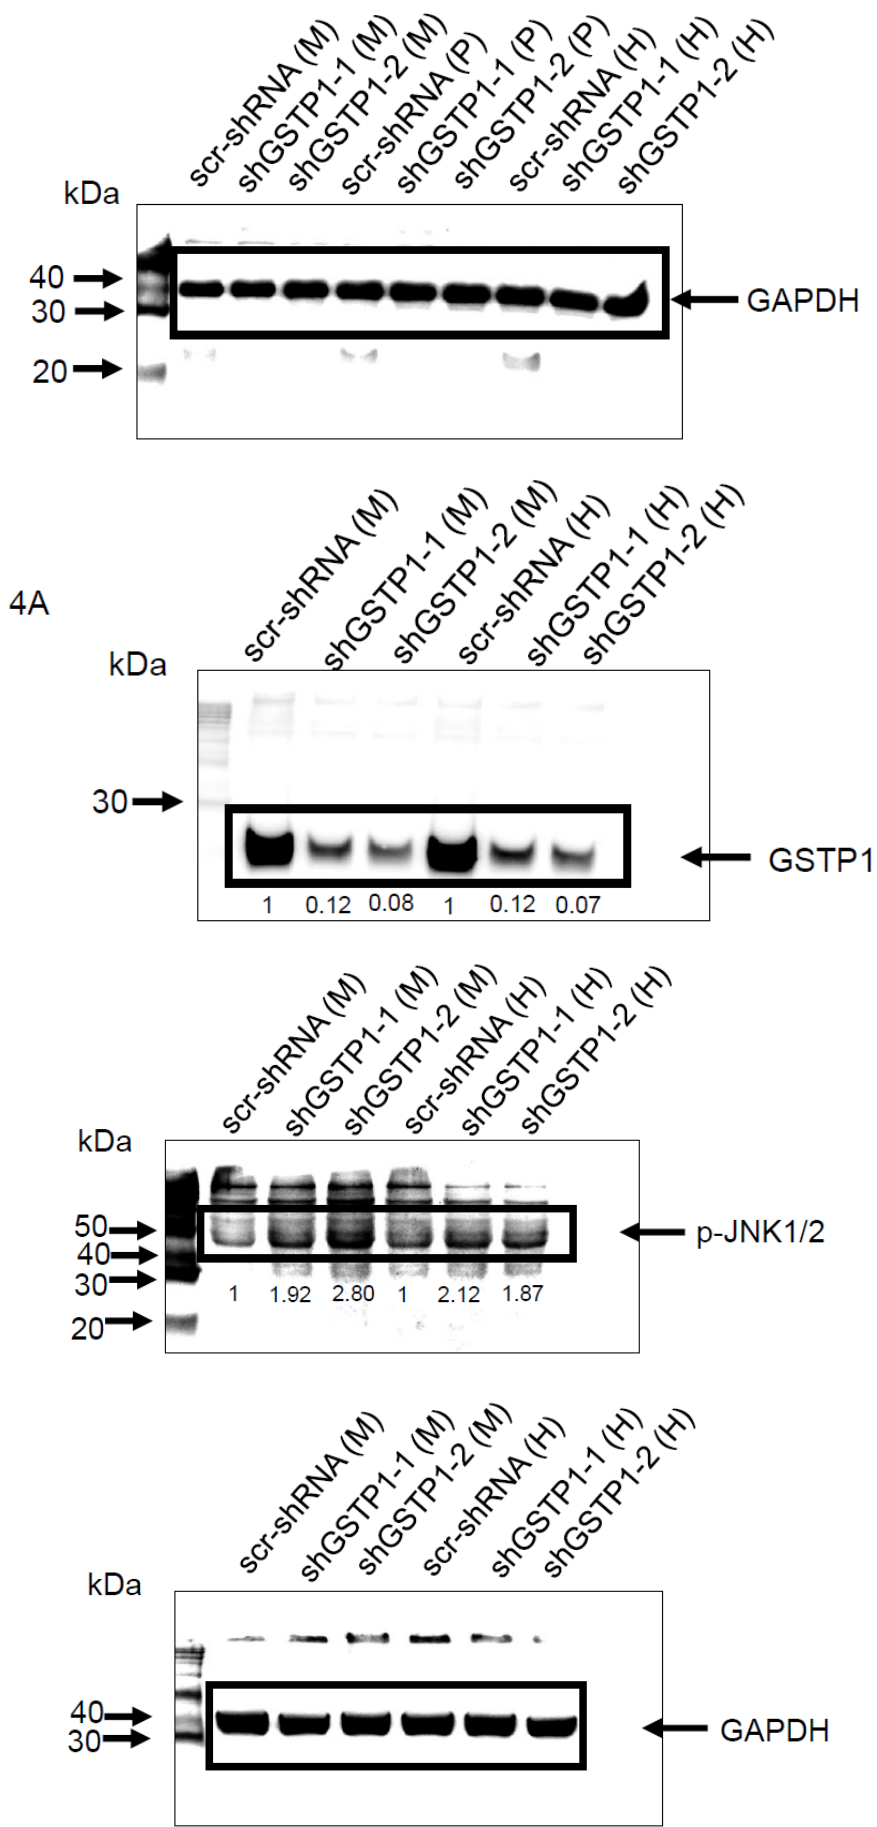

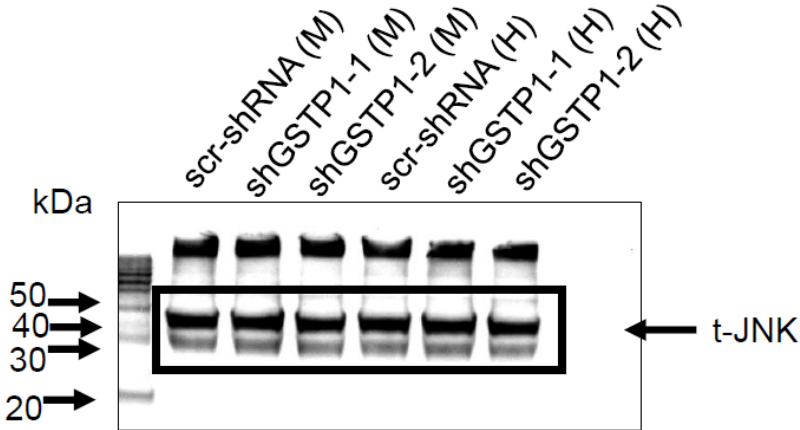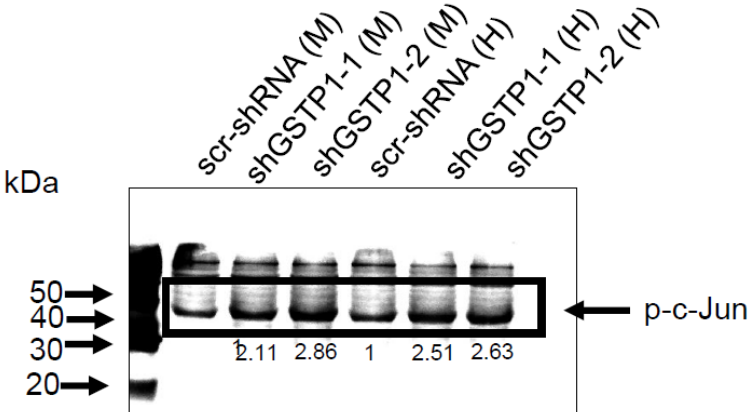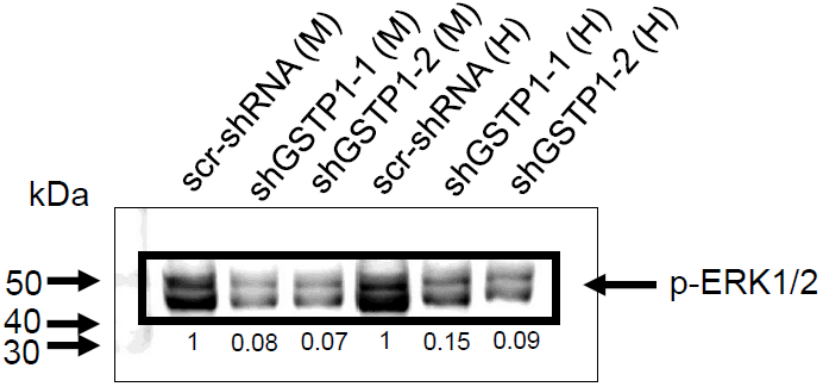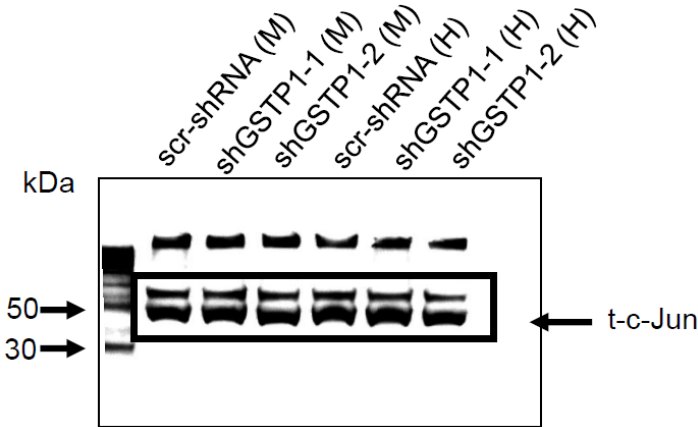

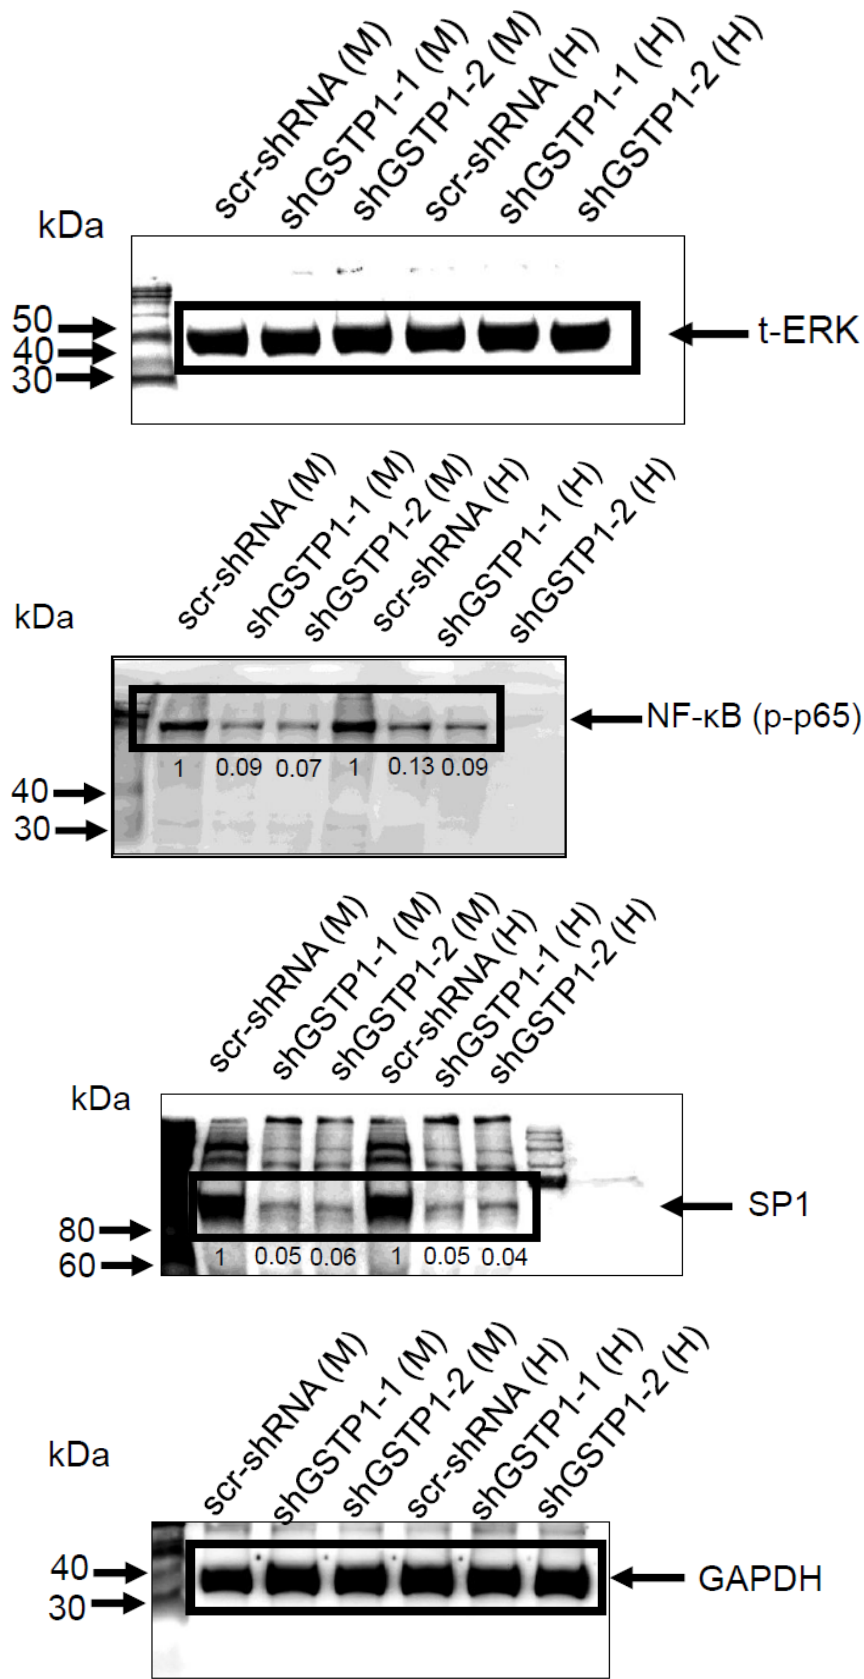

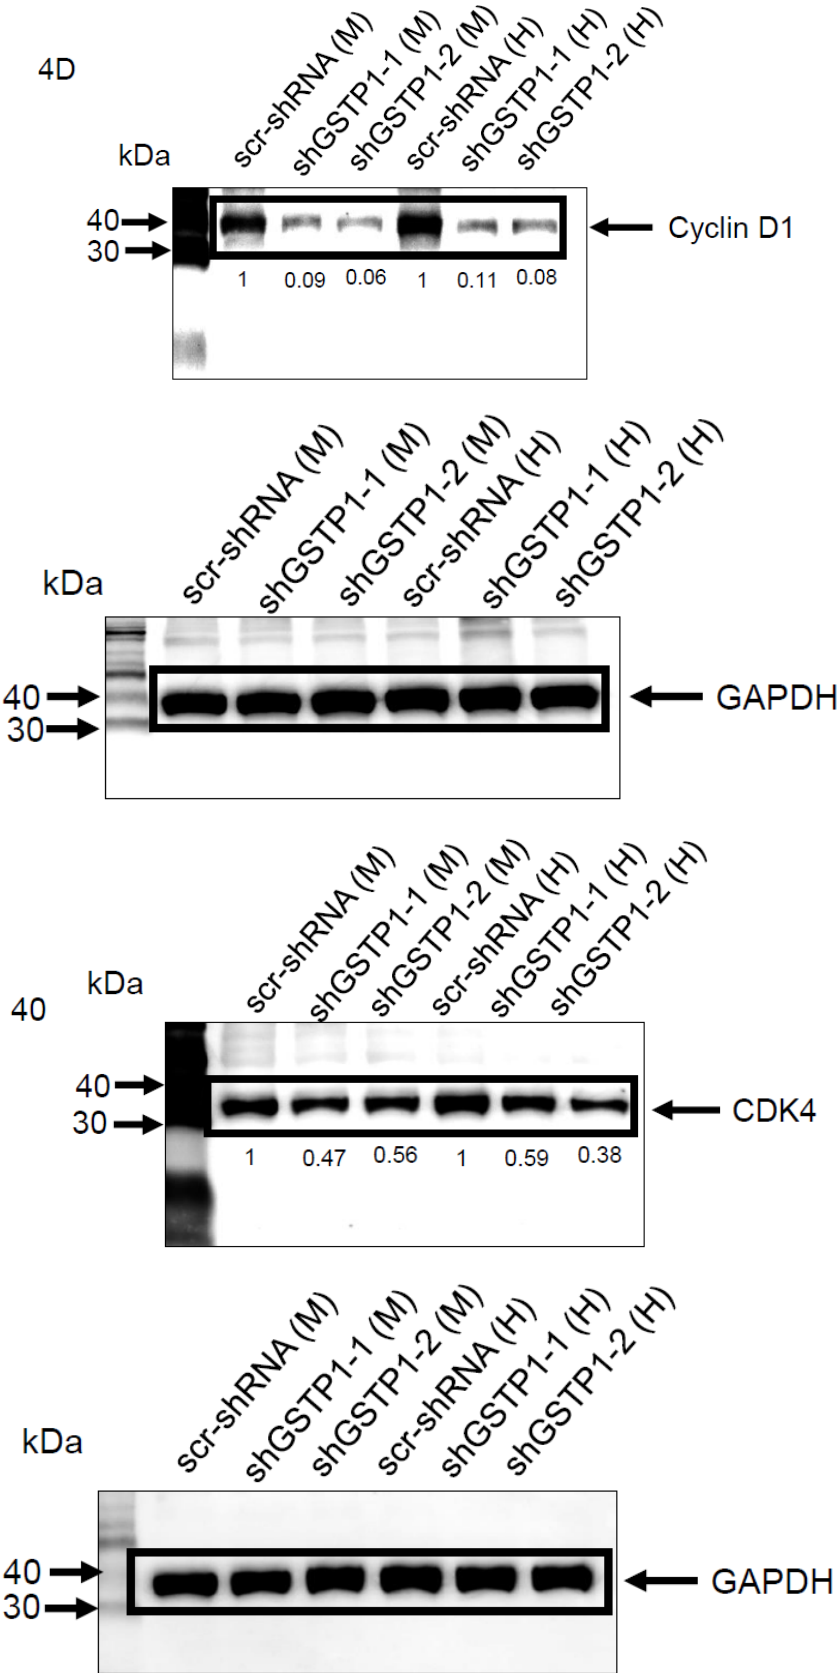

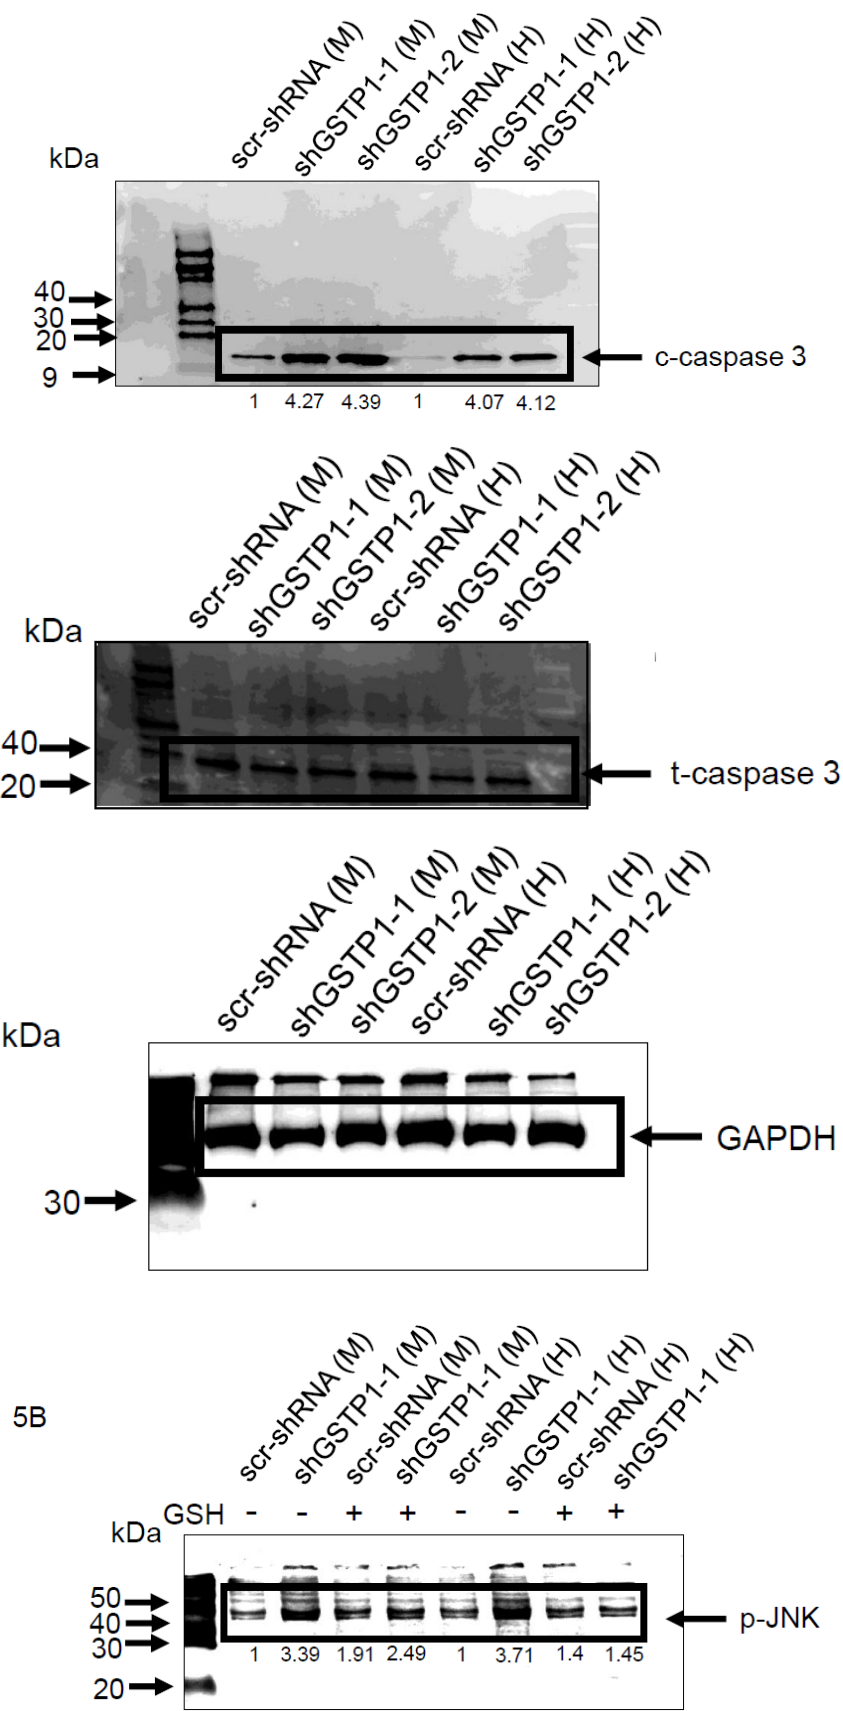

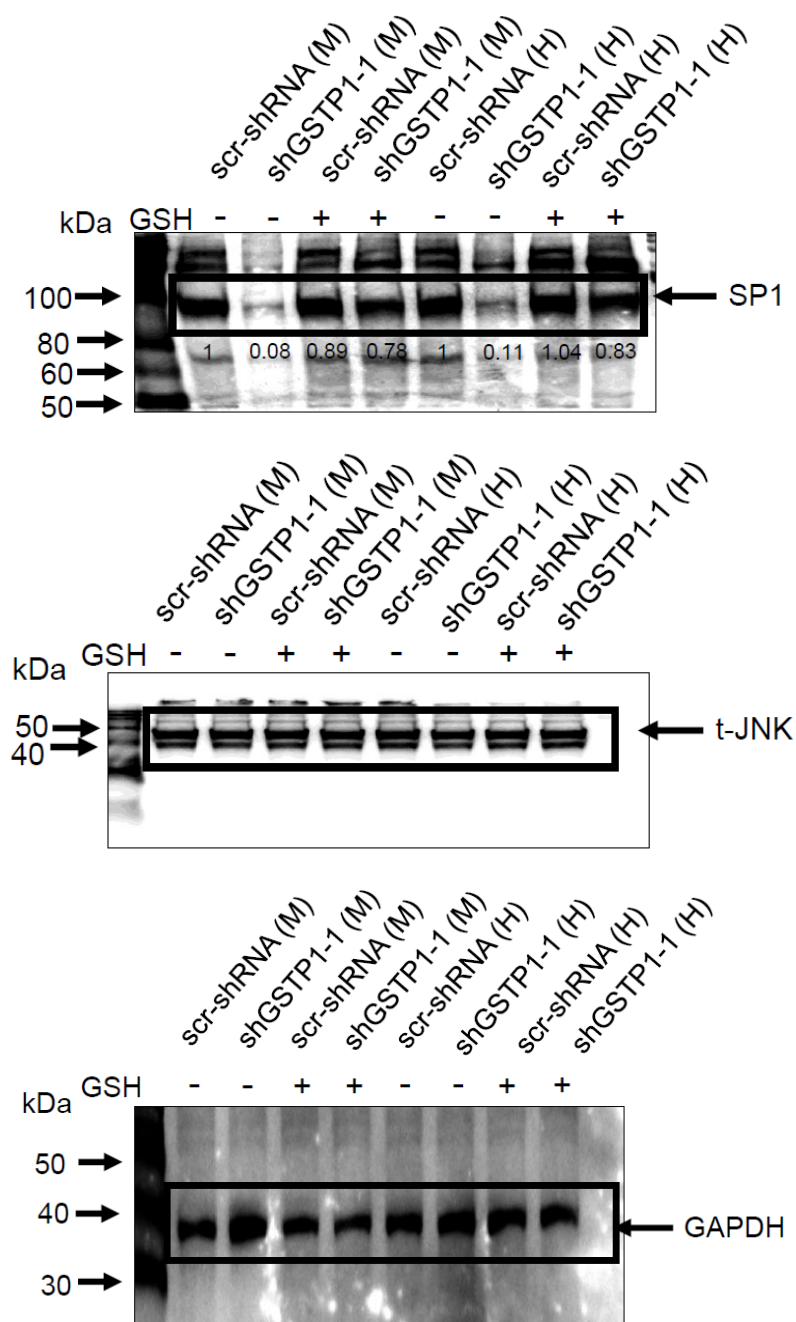

**Figure S1.** Unprocessed images for Western blotting results. Densitometry values are shown in the blot images. (M): MIA PaCa-2, (P): PANC-1 and (H): HPAF-II.

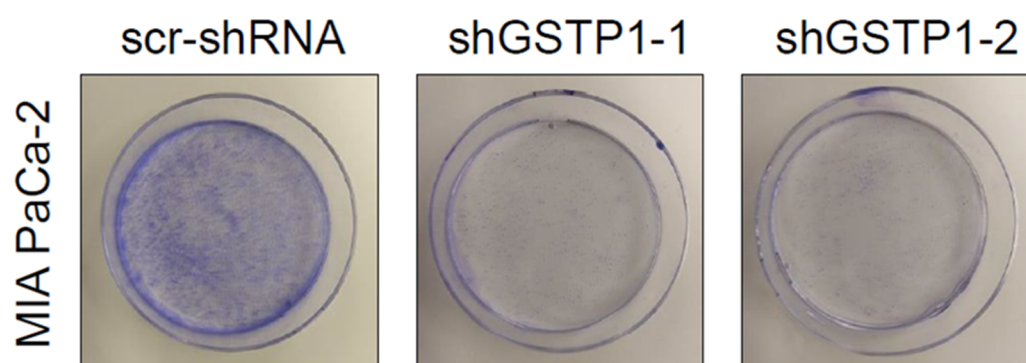

**Figure S2.** Clonogenic survival experiment results obtained for control (scr-shRNA) and GSTP 1 knockdown (shGSTP 1-1 and GSTP 1-2) MIA PaCa-2 cells.

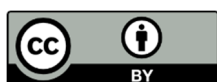

© 2020 by the authors. Submitted for possible open access publication under the terms and conditions of the Creative Commons Attribution (CC BY) license (<http://creativecommons.org/licenses/by/4.0/>).
